# Supplementary material
Source: publisher figshare collection journal article supplement (https://acs.figshare.com/ndownloader/files/3920260)
Supplement: Supplementary file 1 [file 3920260]

## Supporting Information

### Near-Infrared Light-Triggered “On/Off” Motion of Polymer Multilayer Rockets

Zhiguang Wu,<sup>†</sup> Xiankun Lin,<sup>†</sup> Yingjie Wu, Teyan Si\*, Jianmin Sun, and Qiang He\*

State Key Laboratory of Robotics and System (HIT), the Academy of Fundamental and Interdisciplinary Sciences, Harbin Institute of Technology, Harbin 150080 (China)

\*E-mail: qianghe@hit.edu.cn; teyansi@hit.edu.cn

**SI Video 1** The launch of a T7 AuNS (PAH/PSS)<sub>20</sub> PtNPs nanorocket in 0.1% H<sub>2</sub>O<sub>2</sub> promoted by the radiation of NIR laser (the movie has been accelerated to 200% for the clear demonstration). Scale bar = 20 μm.

**SI Video 2** The movement of a T7 AuNS (PAH/PSS)<sub>20</sub> PtNPs nanorocket in water under the NIR irradiation with laser power of 3 mW/μm<sup>2</sup>. Scale bar = 20 μm.

**SI Video 3** The motion of a T7 AuNS (PAH/PSS)<sub>20</sub> PtNPs nanorocket toward red blood cells in 0.5% H<sub>2</sub>O<sub>2</sub> solution. Scale bar = 20 μm.

**SI Video 4** The motion of a T7 AuNS (PAH/PSS)<sub>20</sub> PtNPs nanorocket towards the HeLa cells in 0.1% H<sub>2</sub>O<sub>2</sub>. Scale bar = 10 μm.

Supporting Figures

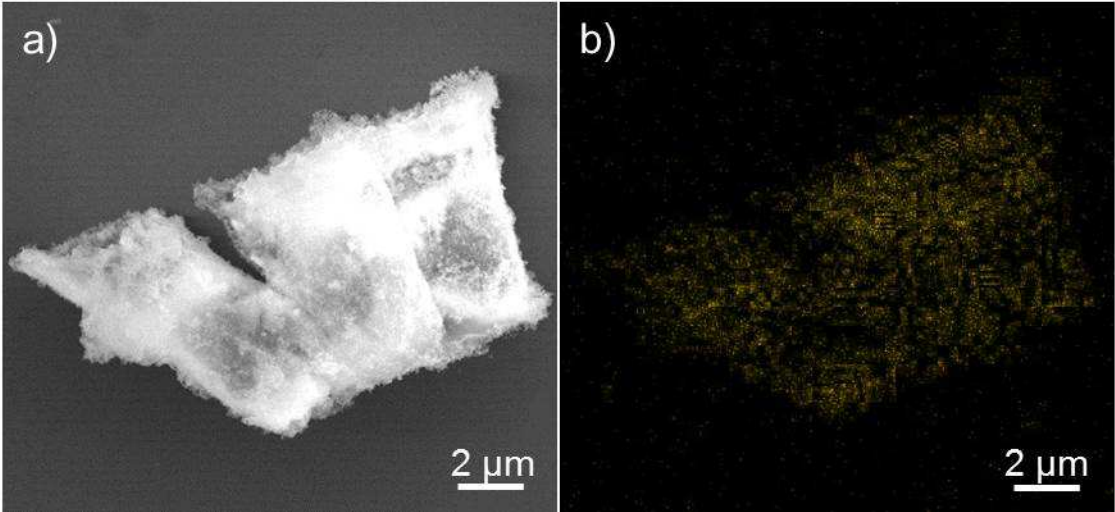

SI Figure 1. (a) SEM image of T7 AuNS (PAH/PSS)<sub>20</sub> PtNPs motor and the corresponding EDX mapping analysis of Au.

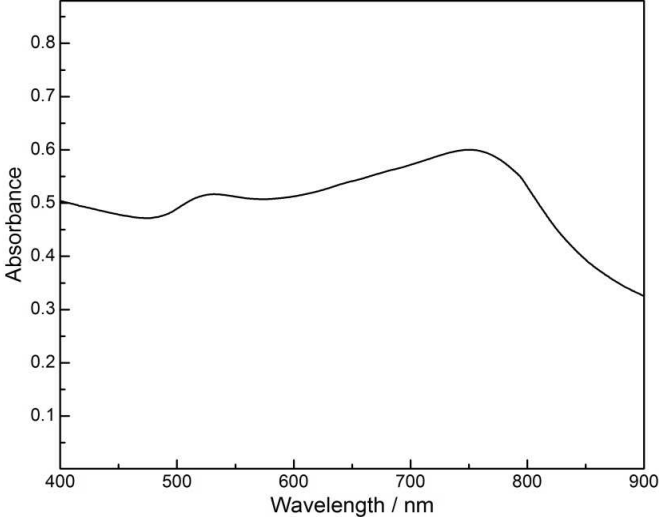

SI Figure 2. UV-vis spectrum of the T7 AuNS (PAH/PSS)<sub>20</sub> PtNPs motor.

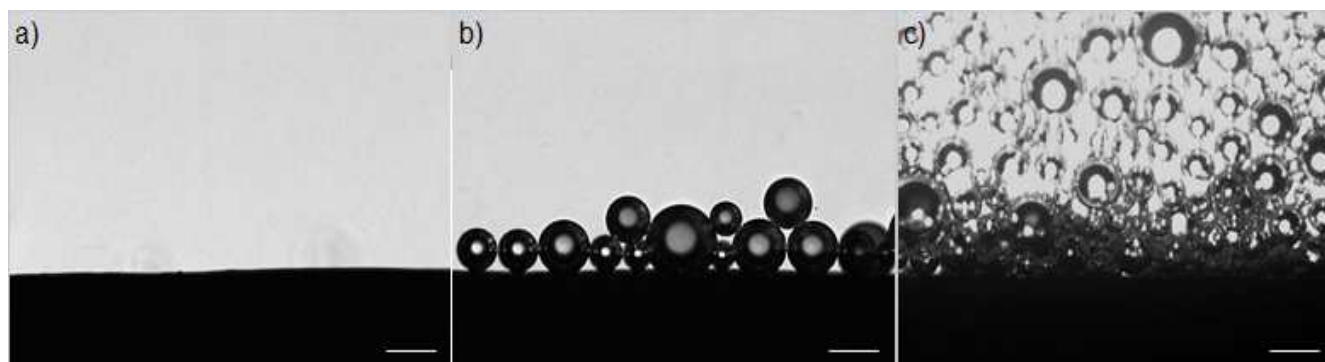

**SI Figure 3.** Optical images of the glass slide coated with the (PAH/PSS)<sub>20</sub> PtNPs thin film in water (a), in 0.1% (v/v) H<sub>2</sub>O<sub>2</sub> at room temperature (b), and in 0.1% (v/v) H<sub>2</sub>O<sub>2</sub> at 70 °C (c). Scale bar = 50 μm.

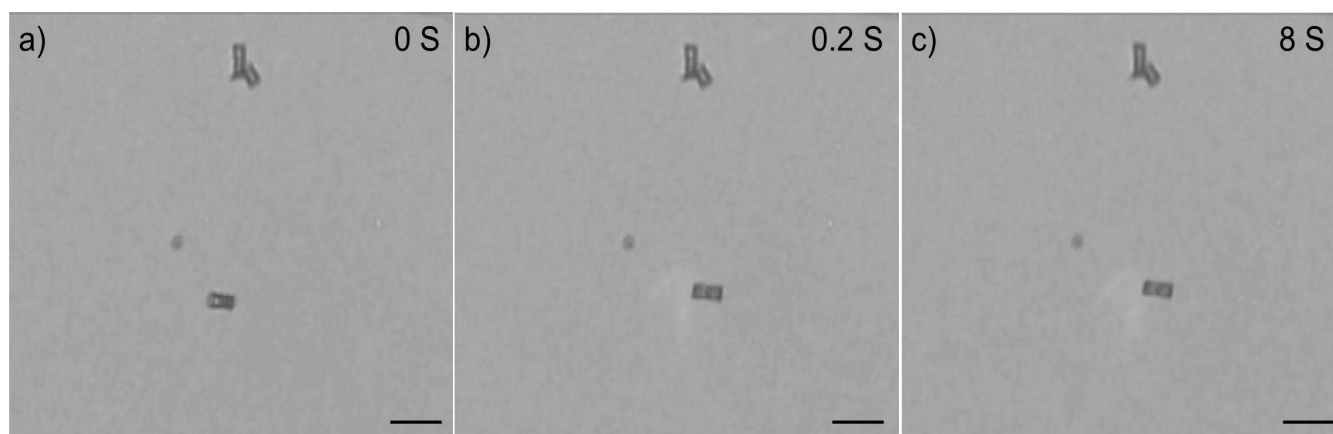

**SI Figure 4.** Time-lapse images of the movement of the T7 AuNS (PAH/PSS)<sub>20</sub> PtNPs microengine under NIR laser with the power of 3 mW/μm<sup>2</sup> in pure water. Scale bar = 20 μm.
